# Supplementary material for: Integrated Analysis of the Functions and Prognostic Values of RNA Binding Proteins in Lung Squamous Cell Carcinoma
Source: PubMed Central journal article supplement (PMC7066120; doi:10.3389/fgene.2020.00185), 2020-03-05
Supplement: Presentation_1.pdf [file Presentation_1.pdf]

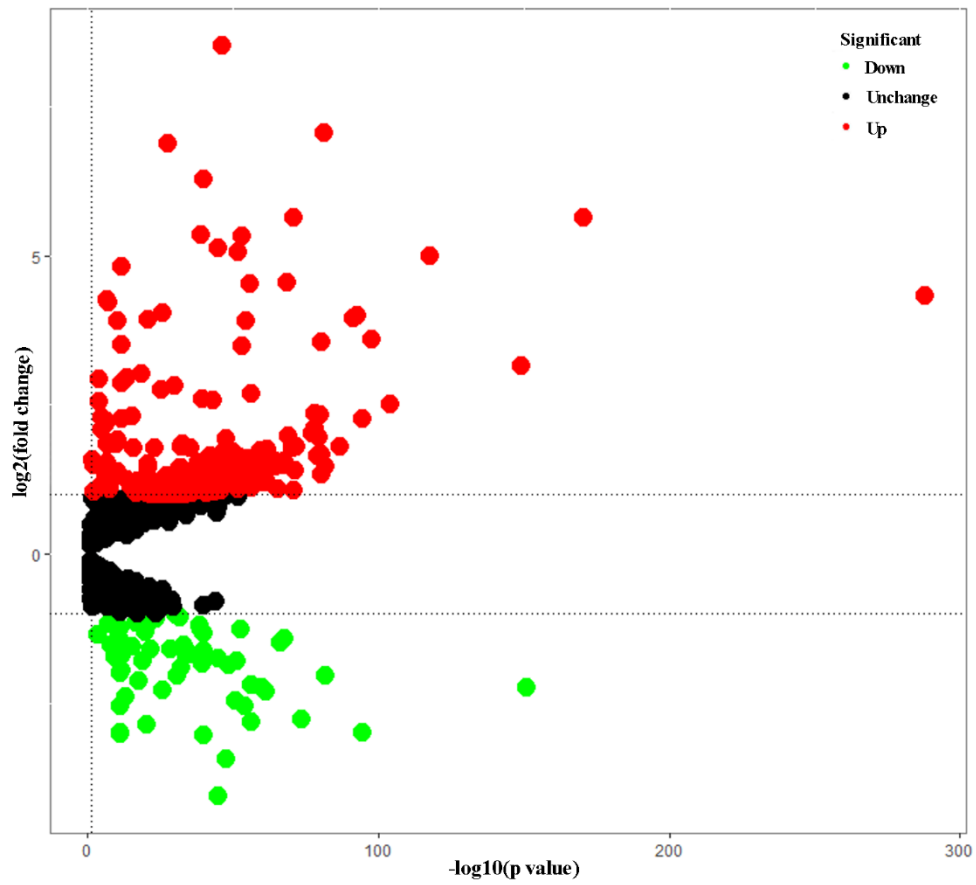

**Figure S1** Differentially expressed RBPs in LUSC. Red: upregulation with  $\text{FC} > 2$ ; green: downregulation with  $\text{FC} > 2$ ; black: not significant.

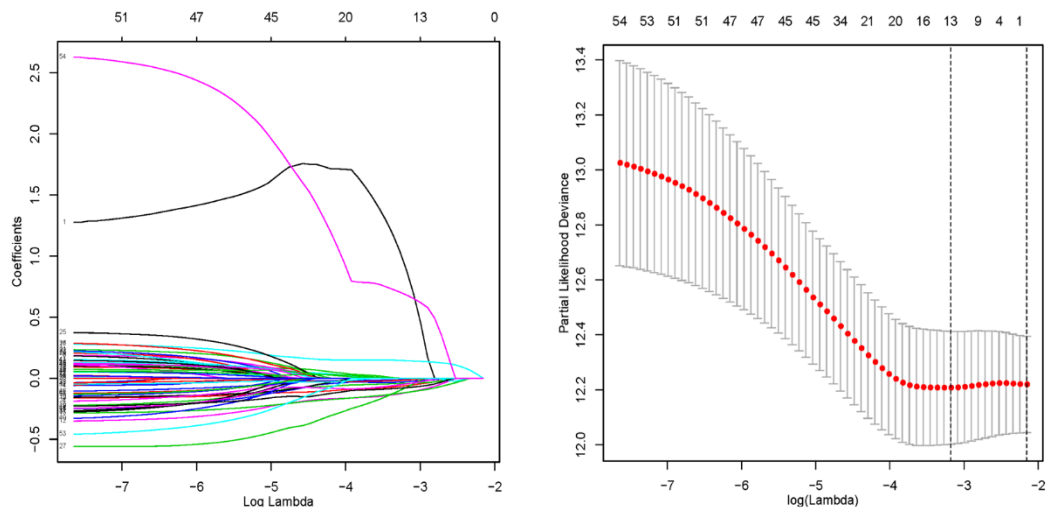

**Figure S2** LASSO regression analysis for screening prognosis-related RBPs.
